# Supplementary material for: The interplay of Hrd3 and the molecular chaperone system ensures efficient degradation of malfolded secretory proteins
Source: PubMed Central journal article supplement — Mol Biol Cell. 2015 Jan 15;26(2):185–94. doi: 10.1091/mbc.E14-07-1202 (PMC4294667; doi:10.1091/mbc.e14-07-1202), 2015-01-15
Supplement: supp_E14-07-1202v1_CombinedSupMats.pdf [file supp_E14-07-1202v1_CombinedSupMats.pdf]

# Supplemental Materials

*Molecular Biology of the Cell*

Mehnert et al.

## Supplementary Figure legends

**Supplementary Figure S1.** (A) Yeast cells disrupted for *hrd3* and expressing the indicated plasmid-encoded Hrd3 variants were monitored for CPY\* degradation by pulse chase analysis. (B) Turnover of CPY\* was determined in  $\Delta$ *hrd3* yeast strains containing empty vector or plasmids for the expression of Hrd3KR or Hrd3 K652A R653A by radioactive pulse chase analysis. Mean values of two independent experiments are shown. (C) Predicted structural model of Hrd3 as calculated by the Phyre2 program (Kelley and Sternberg, 2009). The insert depicts the relative position of residues K652 and R653 in the most carboxyterminal SLR. (D) Cycloheximide decay experiment to measure CD4 turnover in  $\Delta$ *hrd3* cells containing plasmids for the expression of the indicated Hrd3 variants. Signals from the fluorescently-labeled secondary antibodies were quantified using a laser scanner. Mean values of two independent experiments are shown. (E) Radioactive pulse-chase analysis to investigate the degradation of plasmid-encoded CT\* in yeast cells of the given genotype. (F) Pulse chase analysis of KWW-turnover in cells of the indicated genotype. Two independent experiments were quantified and mean values representing the percent of KWW left at the specified time points are given in the bottom line.

**Supplementary Figure S2.** (A) Hrd3 prevents aggregation of a malformed protein *in vitro*. The ER-luminal part of Hrd3 (Hrd3lum) expressed in insect cells was purified and added in the given molar ratio to chemically denatured firefly luciferase (Luc) that was diluted in buffer. Aggregation of luciferase was measured in a time course by light scattering at 350 nm. Units on the x-axis refer to light absorption of the sample. Buffer (●), BSA (▽) and DnaJ purified from *E.coli* (◇; kindly provided by J. Brodsky) served as controls. (B) Chemically denatured firefly luciferase was incubated in refolding buffer (Promega) containing the indicated proteins. The enzymatic activity was determined in a luminometer according to the manufacturer's protocol. Mean values from three independent experiments in percent activity of the non-denatured protein (native) and standard deviation of mean are given.

Supplementary Figure S1; Mehnert *et al.*

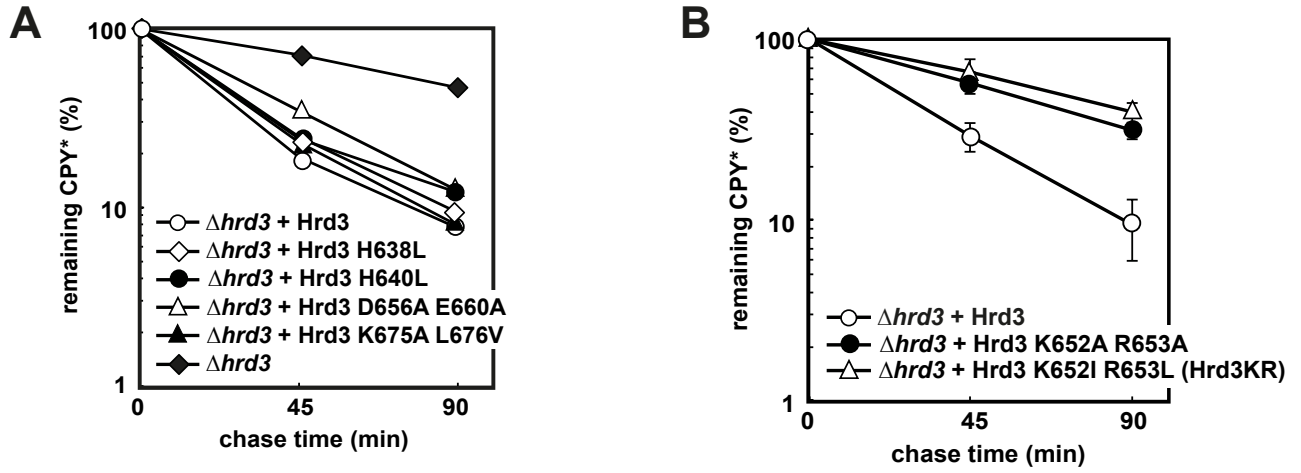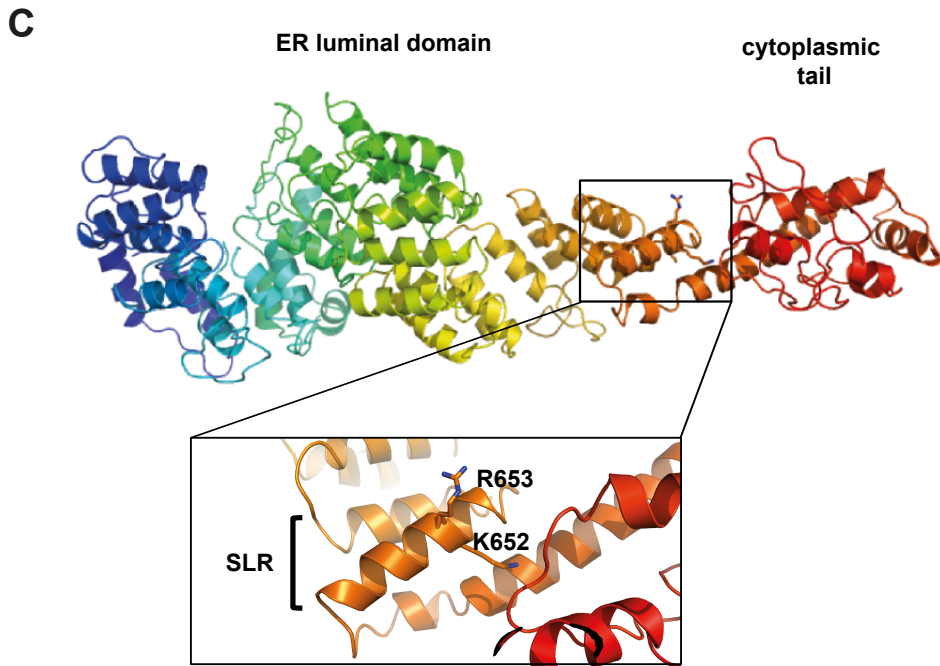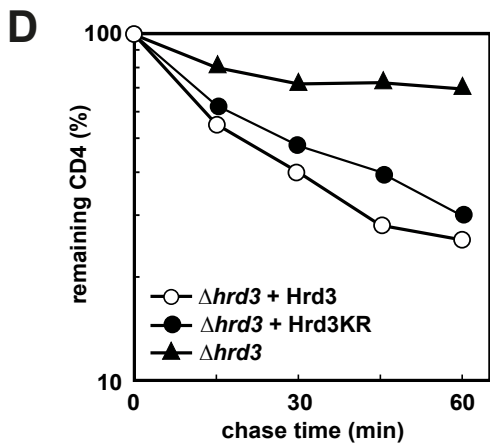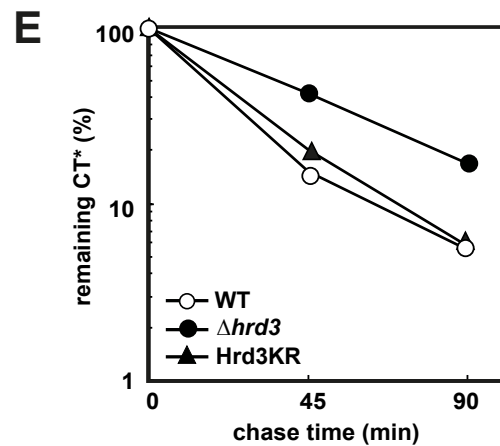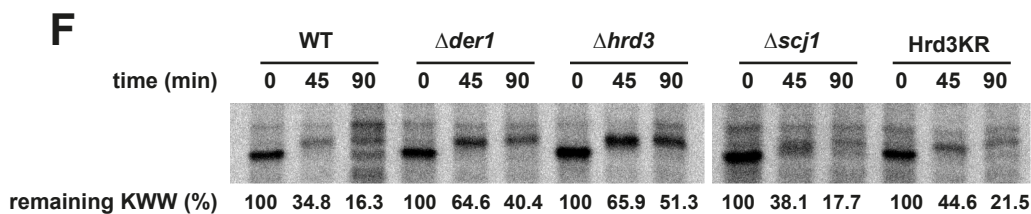

Supplementary Figure S2; Mehnert *et al.*

A

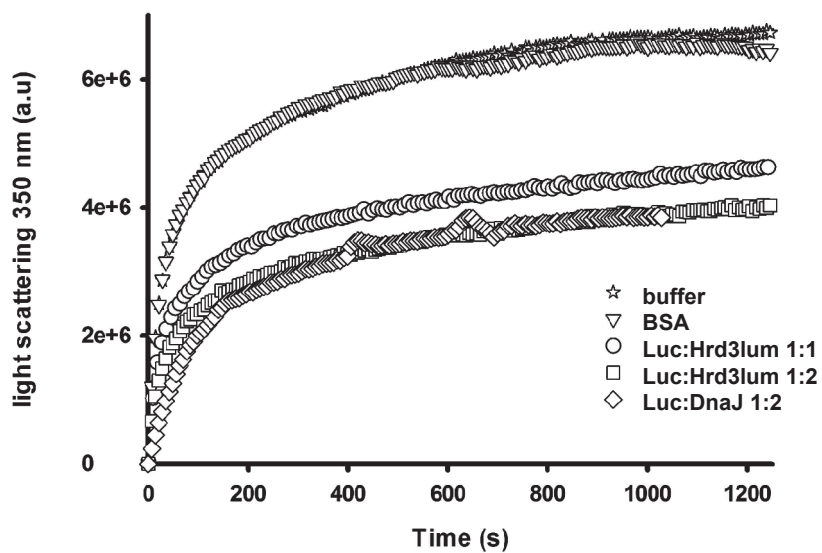

B

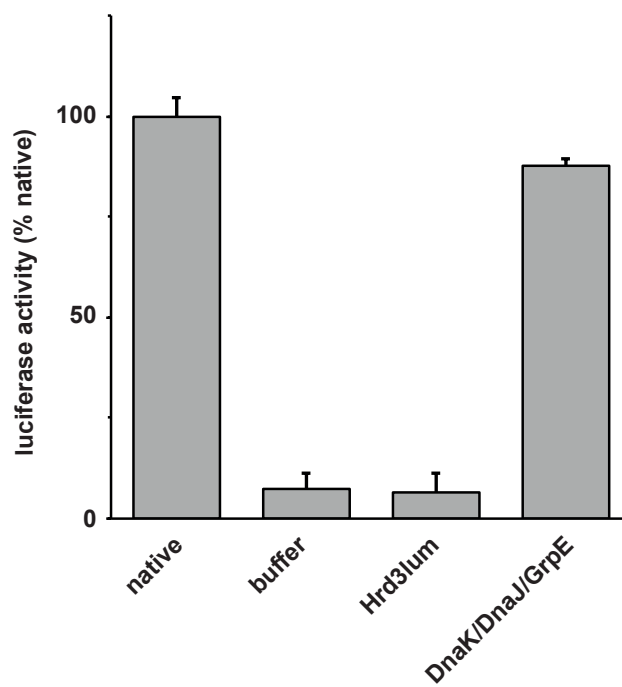

**Supplementary Table 1**

| Name   | Genotype                                                                                                                               | Resource                     |
|--------|----------------------------------------------------------------------------------------------------------------------------------------|------------------------------|
| YBM70  | $\Delta$ hrd3::LEU2, prc1-1, trp1-1(am), his3- 200, ura3-52, lys2-801, leu2-3,-112, MATa                                               | Meusser <i>et al.</i> , 2004 |
| YCH232 | 6xHA-HRD3, YOS9-myc7xHIS(kanMX6), prc1-1, trp1-1 (am), his3-200, leu2-3,-112, lys2-801, ura3-52, MATa                                  | Gauss <i>et al.</i> , 2006b  |
| YFZ004 | 6xHA-hrd3(M637V), prc1-1, trp1-1 (am), his3- 200, leu2-3,-112, lys2-801, ura3-52, MATa                                                 | this work                    |
| YFZ005 | 6xHA-hrd3(H638L), YOS9-myc7xHIS(kanMX6), prc1-1, trp1-1 (am), his3- 200, leu2-3,-112, lys2-801, ura3-52, MATa                          | this work                    |
| YFZ006 | 6xHA-hrd3(M637V), YOS9-myc7xHIS(kanMX6), prc1-1, trp1-1 (am), his3- 200, leu2-3,-112, lys2-801, ura3-52, MATa                          | this work                    |
| YFZ007 | 6xHA-hrd3(KL(675/676)IV), YOS9-myc7xHIS(kanMX6), prc1-1, trp1-1 (am), his3- 200, leu2-3,-112, lys2-801, ura3-52, MATa                  | this work                    |
| YFZ008 | 6xHA-hrd3(E639A), YOS9-myc7xHIS(kanMX6), prc1-1, trp1-1 (am), his3- 200, leu2-3,-112, lys2-801, ura3-52, MATa                          | this work                    |
| YFZ015 | URA3::6xmyc-Hmg2, $\Delta$ hrd3::LEU2, $\Delta$ prc1::LEU2, prc1-1, trp1-1(am), his3- 200, ura3-52, lys2-801, leu2-3,-112, MATa        | this work                    |
| YFZ022 | $\Delta$ pra1::TRP1, prc1-1, trp1-1(am), his3- 200, ura3-52, lys2-801, leu2-3,-112, MATa                                               | this work                    |
| YFZ023 | $\Delta$ pra1::TRP1, $\Delta$ hrd3::LEU2, prc1-1, trp1-1(am), his3- 200, ura3-52, lys2-801, leu2-3,-112, MATa                          | this work                    |
| YFZ024 | $\Delta$ pra1::TRP1, 6xHA-Hrd3, YOS9-myc7xHIS(kanMX6), prc1-1, trp1-1(am), his3- 200, ura3-52, lys2-801, leu2-3,-112, MATa             | this work                    |
| YFZ025 | $\Delta$ pra1::TRP1, 6xHA-Hrd3 KR652/653IL, YOS9-myc7xHIS(kanMX6), prc1-1, trp1-1(am), his3- 200, ura3-52, lys2-801, leu2-3,-112, MATa | this work                    |
| YFZ028 | $\Delta$ pra1::TRP1, $\Delta$ scj1::HIS3, prc1-1, trp1-1(am), his3- 200, ura3-52, lys2-801, leu2-3,-112, MATa                          | this work                    |
| YFZ044 | $\Delta$ hrd3::LEU2, $\Delta$ scj1::HIS3, prc1-1, trp1-1(am), his3- 200, ura3-52, lys2-801, leu2-3,-112, MATa                          | this work                    |
| YRG020 | 6xHA-HRD3, prc1-1, trp1-1(am), his3- 200, leu2-3,-112, lys2-801, ura3-52, MATa                                                         | Gauss <i>et al.</i> , 2006b  |
| YRG146 | SCJ1-9xMyc (TRP1), prc1-1, trp1-1(am), his3- $\Delta$ 200, ura3-52, lys2-801, leu2-3,-112, MATalpha                                    | this work                    |
| YRG175 | 6xHA-HRD3, SCJ1-9xMyc(TRP1), prc1-1, trp1-1(am), his3- $\Delta$ 200, ura3-52, lys2-801, leu2-3,-112, MAT not determined                | this work                    |
| YRG182 | $\Delta$ jem1::kanMX6, prc1-1, trp1-1(am), his3- 200, ura3-52, lys2-801, leu2-3,-112, MATa                                             | this work                    |
| YRG183 | $\Delta$ scj1::HIS3, prc1-1, trp1-1(am), his3- 200, ura3-52, lys2-801, leu2-3,-112, MATa                                               | this work                    |
| YRG190 | $\Delta$ jem1::kanMX6, scj1::HIS3, prc1-1, trp1-1(am), his3- 200, ura3-52, lys2-801, leu2-3,-112, MATa                                 | this work                    |
| YRG277 | $\Delta$ erj5::HIS3, prc1-1, trp1-1(am), his3- 200, ura3-52, lys2-801, leu2-3,-112, MATa                                               | this work                    |
| YRG284 | 6xHA-HRD3, $\Delta$ scj1::HIS5, prc1-1, trp1-1 (am), his3- 200, leu2-3,-112, lys2-801, ura3-52, MATa                                   | this work                    |
| YRG280 | 6xHA-HRD3, $\Delta$ jem1::kanMX6, prc1-1, trp1-1 (am), his3- 200, leu2-3,-112, lys2-801, ura3-52, , MATa                               | this work                    |
| YRG362 | 6xHA-hrd3(KR652/653IL), YOS9-myc7xHIS(kanMX6), prc1-1, trp1-1 (am), his3- 200, leu2-3,-112, lys2-801, ura3-52, MATa                    | this work                    |
| YRG365 | 6xHA-hrd3(NR645/646II), YOS9-myc7xHIS(kanMX6), prc1-1, trp1-1 (am), his3- 200, leu2-3,-112, lys2-801, ura3-52, MATa                    | this work                    |
| YRG386 | SCJ1-9xMyc (TRP1), $\Delta$ hrd3::LEU2, prc1-1, trp1-1(am), his3- $\Delta$ 200, ura3-52, lys2-801, leu2-3,-112, MATalpha               | this work                    |
| YTX557 | $\Delta$ hrd3::LEU2, Der1-13xmyc (TRP), prc1-1, trp1-1(am), his3- $\Delta$ 200, ura3-52, lys2-801, leu2-3,-112, MATa                   | this work                    |
| YTX485 | HRD1-3xHA (TRP1), $\Delta$ hrd3::LEU2, prc1-1, trp1-1(am), his3- $\Delta$ 200, ura3-52, lys2-801, leu2-3,-112, MATalpha                | this work                    |

|         |                                                                                                                                      |                               |
|---------|--------------------------------------------------------------------------------------------------------------------------------------|-------------------------------|
| YTX1145 | $\Delta$ scj1::HISMX6, CPY*-3xHA (kanMX6), trp1-1(am), his3- $\Delta$ 200, ura3-52, lys2-801, leu2-3,-112, MAT not determined        | this work                     |
| YTX140  | prc1-1, trp1-1(am), his3- 200, ura3-52, lys2-801, leu2-3,-112, MATa                                                                  | Biederer <i>et al.</i> , 1997 |
| YTX365  | CPY*-3xHA (kanMX6), trp1-1(am), his3- $\Delta$ 200, ura3-52, lys2-801, leu2-3,-112, MAT not determined                               | this work                     |
| YTX1213 | URA3:6xMyc-Hmg2, $\Delta$ jem1::kanMX6, prc1-1, trp1-1(am), his3- $\Delta$ 200, ura3-52, lys2-801, leu2-3,-112, MATa                 | this work                     |
| YTX1214 | URA3:6xMyc-Hmg2, $\Delta$ scj1::HIS3, prc1-1, trp1-1(am), his3- $\Delta$ 200, ura3-52, lys2-801, leu2-3,-112, MATalpha               | this work                     |
| YMM072  | $\Delta$ hrd3::LEU2, $\Delta$ der1::HIS3, prc1-1, trp1-1(am), his3- $\Delta$ 200, ura3-52, lys2-801, leu2-3,-112, MAT not determined | this work                     |
| YMM224  | Hrd3 K652I/R653L, prc1-1, trp1-1(am), his3- $\Delta$ 200, ura3-52, lys2-801, leu2-3,-112, MATa                                       | this work                     |
| YMM225  | Hrd3 K652I/R653L, CPY*-3xHA (KanMX), trp1-1(am), his3- $\Delta$ 200, ura3-52, lys2-801, leu2-3,-112, MATa                            | this work                     |

**Supplementary Table 2**

| <b>Name</b> | <b>Insert and/or purpose</b>          | <b>Backbone</b> | <b>Resource</b>              |
|-------------|---------------------------------------|-----------------|------------------------------|
| pBM108      | CD4                                   | pRS414          | Meusser <i>et al.</i> , 2004 |
| pGK1-pBpa   | 3SUP4-tRNA CUA for pBpa incorporation |                 | Chen, <i>et al.</i> , 2007   |
| pFastBac1™  | Baculovirus cloning                   |                 | Invitrogen                   |
| pRH244      | 6xMyc-Hmg2 for genomic integration    |                 | Hampton <i>et al.</i> , 1996 |
| pFZ029      | Hrd3 KR652/653IL                      | pJU301          | this work                    |
| pFZ060      | Hrd3 KR652/653AA                      | pRS317          | this work                    |
| pFZ063      | 6xHA-Hrd3 (-278 ... 2690)             | pRS316          | this work                    |
| pFZ064      | 6xHA-Hrd3 KR652/653IL (-278 ... 2690) | pRS316          | this work                    |
| pTX191      | CPY*-CUP                              | pRS413          | this work                    |
| pTX339      | PrA*                                  | pRS415          | this work                    |
| pWO804      | CT*                                   | pRS316          | Taxis <i>et al.</i> , 2003   |
| pSM101      | KWW                                   | pRS316          | Vashist and Ng, 2004         |
| pJU301      | Hrd3 (-386...2706)                    | pRS317          | this work                    |
| pMM075      | Der1 (1...706)-13xMyc                 | pRS425-CUP      | Mehnert <i>et al.</i> , 2014 |
| pMM083      | 1xHis-Scj1                            | pRS426-CUP      | this work                    |
| pMM084      | Hrd3 KR652/653IL                      | pRS406          | this work                    |
| pMM100      | 1xHis-Scj1                            | pRS414-CUP      | this work                    |
| pMM101      | 1xHis-Scj1                            | pRS424-CUP      | this work                    |
